# Supplementary material
Source: PubMed Central journal article supplement (PMC8083186)
Supplement: NIHMS1025205-supplement-1.pdf [file NIHMS1025205-supplement-1.pdf]

Appendix A. Survey Questions.

1. Gender: M \_\_\_\_\_ F \_\_\_\_\_
2. Current age: \_\_\_\_\_
3. TB testing certification completed as a: Pharmacist: \_\_\_\_\_ Student: \_\_\_\_\_ Other: \_\_\_\_\_
4. Years of practice as a pharmacist: \_\_\_\_\_
5. Practice setting:
  - Chain
  - Independent
  - Hospital
  - Clinic
  - Other
6. City/town of current pharmacy practice site: \_\_\_\_\_
7. Does your current pharmacy practice site have a consulting room? Yes \_\_\_\_\_ No \_\_\_\_\_
8. Does the city or town of your current practice site location have TB testing available at a location other than your pharmacy? Yes \_\_\_\_\_ No \_\_\_\_\_ I don't know \_\_\_\_\_  
If so, do they require an appointment? Yes \_\_\_\_\_ No \_\_\_\_\_ I don't know \_\_\_\_\_  
If so, is the testing free? Yes \_\_\_\_\_ No \_\_\_\_\_ I don't know \_\_\_\_\_
9. Your reason for obtaining TB testing certification (check all that apply):
  - Required by employer
  - Gain Skills / Certification
  - To impact public health
  - Revenue source
  - Other
10. The required TB testing certification training time is currently a 1-hour tutorial and 3-hour in-classroom training. The current training time is:
  - Adequate
  - Excessive, time should be decreased
  - Insufficient, additional training should be required for certification
11. The quality of TB testing training:
  - Exceeded my expectations
  - Met my expectations
  - Failed to meet my expectations

If failed to meet your expectations, please specify the reason

12. Upon completion of the TB testing training I felt confident in administering the tuberculin skin test:
- Strongly Agree
  - Agree
  - Neutral
  - Disagree
  - Strongly disagree
13. Upon completion of the TB testing training I felt confident in interpreting the tuberculin skin test results:
- Strongly Agree
  - Agree
  - Neutral
  - Disagree
  - Strongly disagree
14. Pharmacist performed TB testing benefits the community:
- Strongly Agree
  - Agree
  - Neutral
  - Disagree
  - Strongly disagree
15. TB testing by pharmacists can have a positive impact on community public health:
- Strongly Agree
  - Agree
  - Neutral
  - Disagree
  - Strongly disagree
16. Implementation of the TB testing by pharmacists has been successful in New Mexico:
- Strongly Agree
  - Agree
  - Neutral
  - Disagree
  - Strongly disagree
17. What are advantages to offering TB testing in community pharmacies? (select all that apply)

- Accessibility
- Extended hours
- Fast
- Privacy
- Ability to obtain TST with other multiple services
- Pharmacists' knowledge
- Positive pharmacist-patient relationship
- Other

18. Are you currently performing TB testing in NM? Yes \_\_\_\_ NO \_\_\_\_

**If you answered “No” to question 18, please answer question 19 and STOP. If you answered “Yes” to question 18, skip question 19 and move on to questions 20 – 24.**

**For participants who answered “No” to question 18:**

19. What are the reason(s) for not performing TB testing in NM? (select all that apply).

- Employer lack of support
- Time required to perform test and discuss results
- Staffing issues
- Insufficient consulting space
- Self-confidence in performing tuberculin skin test (TST)
- Inadequate training
- Uneasiness with delivering positive test results
- Lack of information needed to link patients with follow up care for positive results
- Concerns regarding reimbursement
- Concerns regarding spread of communicable disease
- Other, please specify

**STOP HERE. You have completed the survey. Thank you for your time and input.**

**For participants who answered “Yes” to question 18:**

20. How many tests do you perform each week?

- 1-2
- 3-4
- 5-6

- 6-7
- >7

21. How much time is spent in total during the **initial visit** for TST placement and education/counseling?

- 0-5 min
- 6-10 min
- 11-15 min
- 16-20 min
- >20min

22. How much time is spent in total during the **follow up visit** for TST interpretation and education/counseling?

- 0-5 min
- 6-10 min
- 11-15 min
- 16-20 min
- >20min

23. Which educational topics do you regularly discuss with patients receiving a TST during the initial and/or follow up visits? (select all that apply)

- Tuberculosis transmission
- Tuberculosis risk factors
- Differences between latent and active infection
- Signs and symptoms of active infection
- Explanation of how the TST works
- Differences between TST and blood test (IGRA)
- Reasons for false-positive and false-negative results (e.g., BCG vaccination)
- Requirements for follow up testing (i.e., 2<sup>nd</sup> reading within 48-72 hours)
- Explanation of TST results
- Rescreening recommendations (when/if they will need another test)
- Other
- None of the above

24. Please comment on any successes and/or challenges in implementing the tuberculosis testing by pharmacists program.
